# Supplementary material for: Study of the host–guest interaction between N,N′-bis[4-(dimethylaminophenyl)methyl]butane-1,4-diamine and the cucuribit[n]urils (n = 6, 7)
Source: Royal Society of Chemistry journal article supplement (doi:10.1039/c9nj03254a), 2019-01-01
Supplement: c9nj03254a1.pdf [file c9nj03254a1.pdf]

## Supporting Information

### **Study of the host-guest interaction between $N,N'$ -bis[4-(dimethylaminophenyl)methyl]butane-1,4-diamine and the cucurbit[ $n$ ]urils ( $n = 6, 7$ )**

Zhiyou Xiao,<sup>a</sup> Yang Zhou,<sup>b</sup> Weitao Xu,<sup>c</sup> Timothy J. Prior,<sup>d</sup> Bing Bian,<sup>e</sup> Carl Redshaw,<sup>d\*</sup> Zhu Tao,<sup>c</sup> and Xin Xiao,<sup>c\*</sup>

<sup>a</sup> *School of Chemical Engineering, Guizhou Institute of Technology, Guiyang 550003, China*

<sup>b</sup> *College of Chemistry, Chemical Engineering and Materials Science, Shandong Normal University, Jinan 250014, China*

<sup>c</sup> *Key Laboratory of Macrocyclic and Supramolecular Chemistry of Guizhou Province, Guizhou University, Guiyang 550025, China*

<sup>d</sup> *Department of Chemistry & Biochemistry, University of Hull, Hull HU6 7RX, U.K.*

<sup>e</sup> *College of Chemistry and Environmental Engineering, Shandong University of Science and Technology, Qingdao 266590, China.*

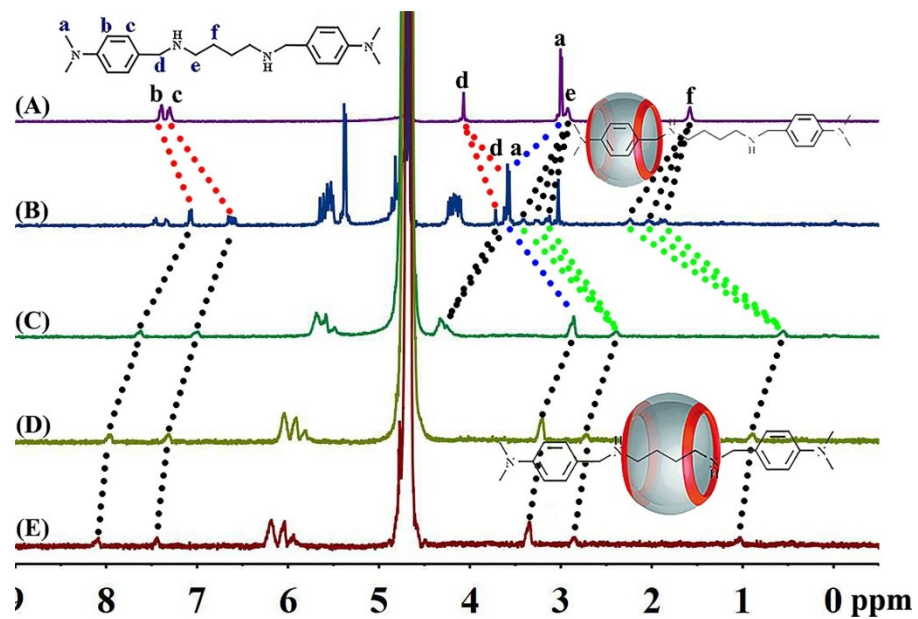

**Figure S1** Interaction of **G** and Q[6] (D<sub>2</sub>O): <sup>1</sup>H NMR spectra of **G** (ca. 2 mM) in the absence of Q[6] (A); in the presence of 1.949 equiv. of Q[6] at 20°C (B); in the presence of 1.949 equiv. of Q[6] at 40°C (C); in the presence of 1.949 equiv. of Q[6] at 60°C (D); in the presence of 1.949 equiv. of Q[6] at 80°C (E).

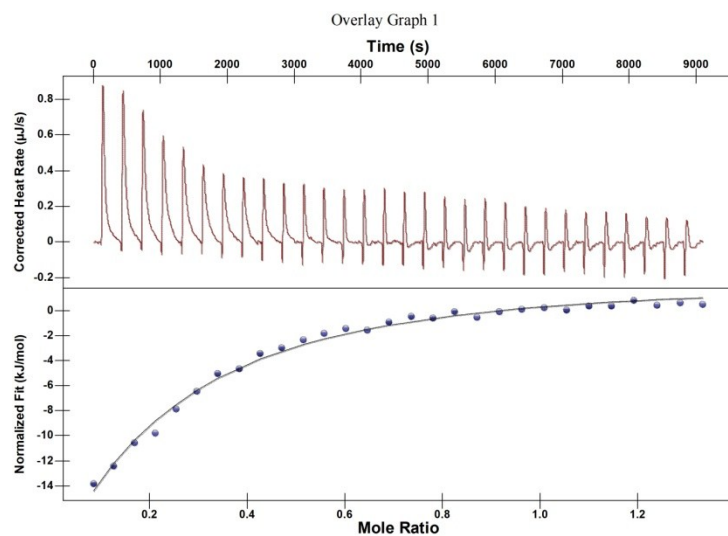

**Figure S2.** ITC data for the binding of Q[6] with G in aqueous solution at 298.15 K.

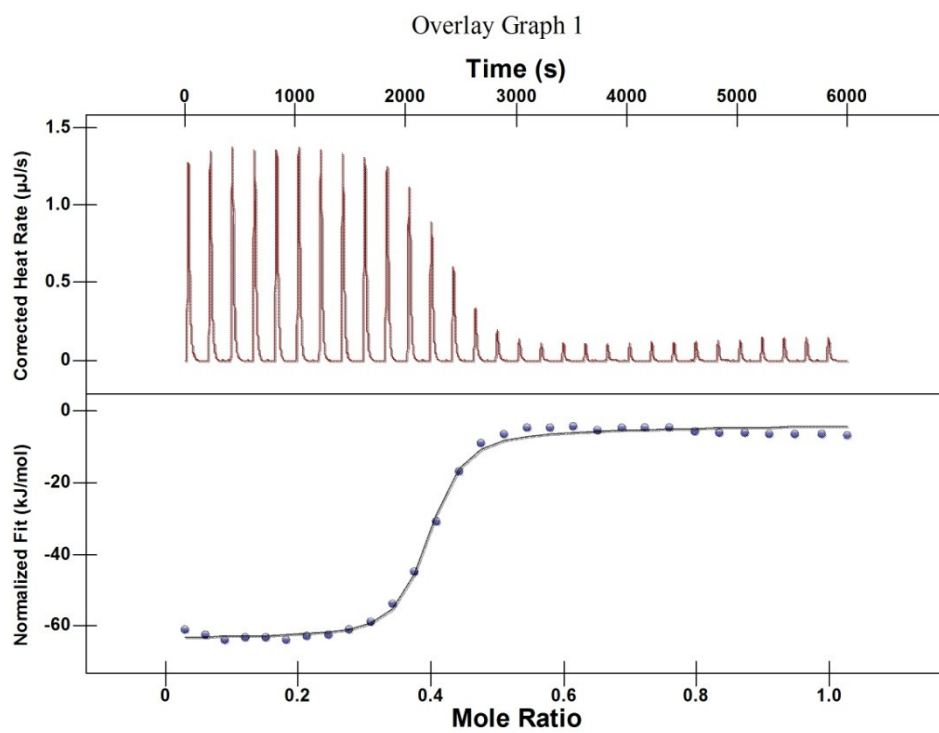

**Figure S3.** ITC data for the binding of Q[7] with G in aqueous solution at 298.15 K.

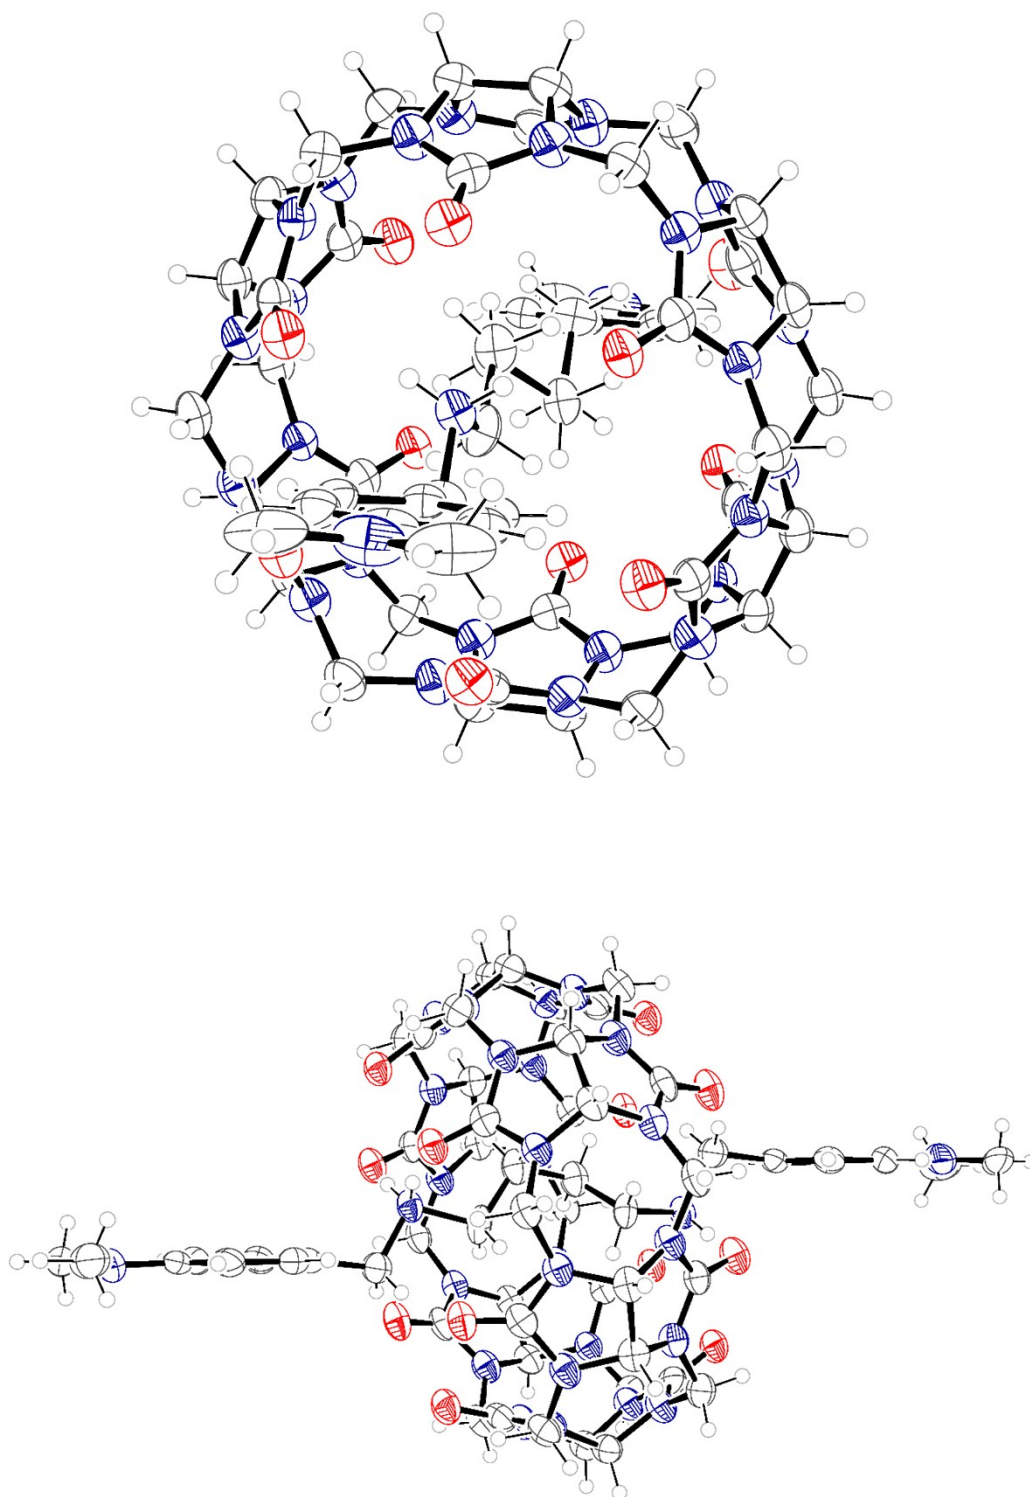

**Figure S4.** Alternative views of the molecular structure of **1**.

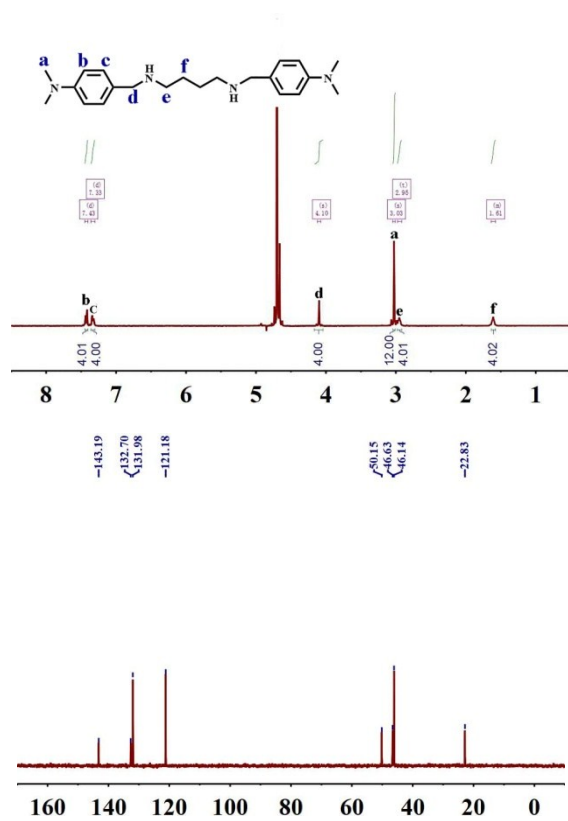

Figure S5.  $^1\text{H}$  and  $^{13}\text{C}$  NMR spectra of G.
